# Supplementary material for: Identification of a Signature Predicting Prognosis of Breast Cancer Patients Through Integrative Analysis of Single-cell and Bulk RNA Sequencing Data
Source: Research Square preprint supplement (doi:10.21203/rs.3.rs-1226555/v1), 2022-01-10
Supplement: Supplementary file 1 [file e37b6d852bfc1d0071b420c1.docx]

**Table S1** The immune escape score (TIDE) of every samples from TCGA database.

| Patient | TIDE |
| --- | --- |
| TCGA-D8-A1XB-01A-11R-A14D-07 | 2.02 |
| TCGA-E9-A22E-01A-11R-A157-07 | 2.02 |
| TCGA-E9-A226-01A-21R-A157-07 | 1.98 |
| TCGA-EW-A2FR-01A-11R-A21T-07 | 1.95 |
| TCGA-E2-A1IO-01A-11R-A144-07 | 1.92 |
| TCGA-BH-A0EI-01A-11R-A115-07 | 1.91 |
| TCGA-4H-AAAK-01A-12R-A41B-07 | 1.89 |
| TCGA-AO-A0J5-01A-11R-A034-07 | 1.88 |
| TCGA-E2-A1BC-01A-11R-A12P-07 | 1.87 |
| TCGA-AR-A2LM-01A-11R-A180-07 | 1.87 |
| TCGA-D8-A1JU-01A-11R-A13Q-07 | 1.86 |
| TCGA-BH-A0DV-01A-21R-A12P-07 | 1.86 |
| TCGA-EW-A1IX-01A-12R-A144-07 | 1.86 |
| TCGA-E9-A1RI-01A-11R-A169-07 | 1.84 |
| TCGA-HN-A2OB-01A-21R-A27Q-07 | 1.84 |
| TCGA-AR-A24V-01A-21R-A169-07 | 1.83 |
| TCGA-BH-A1FH-01A-12R-A13Q-07 | 1.82 |
| TCGA-AN-A03X-01A-21R-A00Z-07 | 1.8 |
| TCGA-AN-A0FN-01A-11R-A034-07 | 1.8 |
| TCGA-A2-A0T6-01A-11R-A084-07 | 1.79 |
| TCGA-A1-A0SI-01A-11R-A144-07 | 1.78 |
| TCGA-E9-A1NF-01A-11R-A14D-07 | 1.76 |
| TCGA-BH-A0DI-01A-21R-A12P-07 | 1.75 |
| TCGA-D8-A1XD-01A-11R-A14D-07 | 1.75 |
| TCGA-AC-A23G-01A-11R-A213-07 | 1.75 |
| TCGA-E2-A1IN-01A-11R-A13Q-07 | 1.74 |
| TCGA-BH-A201-01A-11R-A14M-07 | 1.74 |
| TCGA-AR-A24T-01A-11R-A169-07 | 1.73 |
| TCGA-BH-A0DQ-01A-11R-A084-07 | 1.73 |
| TCGA-BH-A0H6-01A-21R-A056-07 | 1.73 |
| TCGA-A8-A08O-01A-21R-A056-07 | 1.73 |
| TCGA-AR-A24L-01A-11R-A169-07 | 1.72 |
| TCGA-A8-A07E-01A-11R-A034-07 | 1.72 |
| TCGA-A8-A09V-01A-11R-A034-07 | 1.7 |
| TCGA-B6-A0RN-01A-12R-A084-07 | 1.69 |
| TCGA-BH-A0H3-01A-11R-A12P-07 | 1.69 |
| TCGA-A1-A0SH-01A-11R-A084-07 | 1.69 |
| TCGA-AN-A0XN-01A-21R-A109-07 | 1.69 |
| TCGA-D8-A1Y1-01A-21R-A14M-07 | 1.69 |
| TCGA-A7-A4SE-01A-11R-A266-07 | 1.68 |
| TCGA-A7-A5ZW-01A-12R-A29R-07 | 1.68 |
| TCGA-E9-A1R5-01A-11R-A14M-07 | 1.67 |
| TCGA-A8-A07G-01A-11R-A034-07 | 1.67 |
| TCGA-B6-A0WT-01A-11R-A109-07 | 1.67 |
| TCGA-B6-A0RI-01A-11R-A056-07 | 1.66 |
| TCGA-BH-A1EO-01A-11R-A137-07 | 1.66 |
| TCGA-E9-A229-01A-31R-A157-07 | 1.66 |
| TCGA-E2-A15L-01A-11R-A12D-07 | 1.65 |
| TCGA-AC-A23E-01A-11R-A157-07 | 1.65 |
| TCGA-E9-A1N5-01A-11R-A14D-07 | 1.65 |
| TCGA-BH-A208-01A-11R-A157-07 | 1.65 |
| TCGA-AR-A24P-01A-11R-A169-07 | 1.64 |
| TCGA-AO-A12C-01A-11R-A10J-07 | 1.64 |
| TCGA-D8-A141-01A-11R-A115-07 | 1.63 |
| TCGA-BH-A0H7-01A-13R-A056-07 | 1.63 |
| TCGA-AO-A0JF-01A-11R-A056-07 | 1.63 |
| TCGA-E9-A1NG-01A-21R-A14M-07 | 1.62 |
| TCGA-E2-A153-01A-12R-A12D-07 | 1.61 |
| TCGA-D8-A27T-01A-11R-A16F-07 | 1.61 |
| TCGA-BH-A0AV-01A-31R-A115-07 | 1.61 |
| TCGA-AN-A04A-01A-21R-A034-07 | 1.6 |
| TCGA-E2-A570-01A-11R-A29R-07 | 1.6 |
| TCGA-A8-A086-01A-11R-A00Z-07 | 1.6 |
| TCGA-A8-A06P-01A-11R-A00Z-07 | 1.6 |
| TCGA-D8-A27L-01A-11R-A16F-07 | 1.6 |
| TCGA-D8-A1JH-01A-11R-A13Q-07 | 1.59 |
| TCGA-C8-A8HR-01A-11R-A36F-07 | 1.59 |
| TCGA-E2-A1IL-01A-11R-A14D-07 | 1.59 |
| TCGA-B6-A0X7-01A-11R-A10J-07 | 1.58 |
| TCGA-AN-A0FS-01A-11R-A034-07 | 1.58 |
| TCGA-BH-A18I-01A-11R-A12D-07 | 1.58 |
| TCGA-AN-A0FY-01A-11R-A034-07 | 1.58 |
| TCGA-A7-A5ZX-01A-12R-A29R-07 | 1.57 |
| TCGA-D8-A1JD-01A-11R-A13Q-07 | 1.57 |
| TCGA-AR-A2LQ-01A-22R-A18M-07 | 1.56 |
| TCGA-BH-A18M-01A-11R-A12D-07 | 1.56 |
| TCGA-BH-A0W4-01A-11R-A109-07 | 1.55 |
| TCGA-AO-A126-01A-11R-A10J-07 | 1.55 |
| TCGA-AC-A3W6-01A-12R-A22K-07 | 1.54 |
| TCGA-D8-A27H-01A-11R-A16F-07 | 1.54 |
| TCGA-BH-A0AU-01A-11R-A12P-07 | 1.54 |
| TCGA-AC-A3YI-01A-21R-A239-07 | 1.54 |
| TCGA-E9-A22A-01A-11R-A157-07 | 1.53 |
| TCGA-A2-A04N-01A-11R-A115-07 | 1.53 |
| TCGA-A2-A0T7-01A-21R-A084-07 | 1.53 |
| TCGA-A8-A093-01A-11R-A00Z-07 | 1.52 |
| TCGA-A7-A6VX-01A-12R-A33J-07 | 1.52 |
| TCGA-E2-A158-11A-22R-A12D-07 | 1.52 |
| TCGA-E2-A152-01A-11R-A12D-07 | 1.52 |
| TCGA-D8-A27I-01A-11R-A16F-07 | 1.52 |
| TCGA-E2-A1IG-01A-11R-A144-07 | 1.52 |
| TCGA-C8-A12N-01A-11R-A115-07 | 1.52 |
| TCGA-A2-A0YD-01A-11R-A109-07 | 1.51 |
| TCGA-A8-A08Z-01A-21R-A00Z-07 | 1.51 |
| TCGA-A2-A0CP-01A-11R-A034-07 | 1.51 |
| TCGA-AR-A250-01A-31R-A169-07 | 1.5 |
| TCGA-AR-A1AY-01A-21R-A12P-07 | 1.5 |
| TCGA-E2-A1L9-01A-11R-A13Q-07 | 1.5 |
| TCGA-BH-A1FU-01A-11R-A14D-07 | 1.49 |
| TCGA-A1-A0SE-01A-11R-A084-07 | 1.49 |
| TCGA-BH-A0AZ-11A-22R-A12P-07 | 1.48 |
| TCGA-BH-A1ES-01A-11R-A137-07 | 1.48 |
| TCGA-BH-A28Q-01A-11R-A16F-07 | 1.48 |
| TCGA-E9-A1NH-01A-11R-A14D-07 | 1.48 |
| TCGA-BH-A1F2-01A-31R-A13Q-07 | 1.48 |
| TCGA-D8-A1JE-01A-11R-A13Q-07 | 1.48 |
| TCGA-AN-A0XL-01A-11R-A10J-07 | 1.48 |
| TCGA-AC-A2QI-01A-12R-A19W-07 | 1.47 |
| TCGA-EW-A6SC-01A-12R-A32P-07 | 1.46 |
| TCGA-AC-A6IX-01A-12R-A32P-07 | 1.46 |
| TCGA-BH-A0EA-01A-11R-A115-07 | 1.46 |
| TCGA-A2-A0EO-01A-11R-A034-07 | 1.46 |
| TCGA-3C-AALK-01A-11R-A41B-07 | 1.46 |
| TCGA-BH-A0BQ-01A-21R-A115-07 | 1.45 |
| TCGA-BH-A0BP-01A-11R-A115-07 | 1.45 |
| TCGA-E2-A10F-01A-11R-A10J-07 | 1.45 |
| TCGA-BH-A18M-11A-33R-A12D-07 | 1.45 |
| TCGA-E9-A1N6-01A-11R-A144-07 | 1.45 |
| TCGA-OL-A66K-01A-11R-A29R-07 | 1.44 |
| TCGA-A8-A097-01A-11R-A034-07 | 1.44 |
| TCGA-A7-A26J-01A-11R-A169-07 | 1.44 |
| TCGA-B6-A0I6-01A-11R-A034-07 | 1.44 |
| TCGA-D8-A146-01A-31R-A115-07 | 1.44 |
| TCGA-E9-A1N5-11A-41R-A14D-07 | 1.43 |
| TCGA-D8-A27F-01A-11R-A16F-07 | 1.43 |
| TCGA-B6-A40C-01A-11R-A239-07 | 1.43 |
| TCGA-BH-A0DG-01A-21R-A12P-07 | 1.42 |
| TCGA-BH-A0BR-01A-21R-A115-07 | 1.42 |
| TCGA-A2-A4RW-01A-21R-A266-07 | 1.42 |
| TCGA-A2-A0EW-01A-21R-A115-07 | 1.42 |
| TCGA-AR-A24O-01A-11R-A169-07 | 1.42 |
| TCGA-EW-A1J2-01A-21R-A13Q-07 | 1.41 |
| TCGA-AO-A0JA-01A-11R-A056-07 | 1.41 |
| TCGA-A1-A0SG-01A-11R-A144-07 | 1.41 |
| TCGA-BH-A0BV-11A-31R-A089-07 | 1.4 |
| TCGA-A2-A0T4-01A-31R-A084-07 | 1.4 |
| TCGA-EW-A424-01A-11R-A24H-07 | 1.4 |
| TCGA-AR-A1AL-01A-21R-A12P-07 | 1.39 |
| TCGA-A2-A25A-01A-12R-A16F-07 | 1.39 |
| TCGA-E9-A1R3-01A-31R-A14M-07 | 1.39 |
| TCGA-E2-A154-01A-11R-A115-07 | 1.39 |
| TCGA-AC-A3HN-01A-11R-A213-07 | 1.38 |
| TCGA-B6-A0WX-01A-11R-A109-07 | 1.38 |
| TCGA-AN-A0FD-01A-11R-A034-07 | 1.38 |
| TCGA-E2-A15E-01A-11R-A12D-07 | 1.38 |
| TCGA-BH-A18K-01A-11R-A12D-07 | 1.38 |
| TCGA-AN-A0AS-01A-11R-A00Z-07 | 1.38 |
| TCGA-BH-A204-11A-53R-A157-07 | 1.37 |
| TCGA-D8-A1JJ-01A-31R-A14M-07 | 1.37 |
| TCGA-A2-A04V-01A-21R-A034-07 | 1.37 |
| TCGA-C8-A12T-01A-11R-A115-07 | 1.37 |
| TCGA-LL-A5YP-01A-21R-A28M-07 | 1.37 |
| TCGA-S3-AA14-01A-11R-A41B-07 | 1.36 |
| TCGA-D8-A147-01A-11R-A115-07 | 1.36 |
| TCGA-AR-A0TZ-01A-12R-A084-07 | 1.36 |
| TCGA-EW-A1PG-01A-11R-A144-07 | 1.36 |
| TCGA-GM-A5PX-01A-12R-A28M-07 | 1.36 |
| TCGA-BH-A0B5-01A-11R-A12P-07 | 1.36 |
| TCGA-B6-A0RU-01A-11R-A084-07 | 1.36 |
| TCGA-AR-A2LN-01A-21R-A18M-07 | 1.36 |
| TCGA-AR-A255-01A-11R-A169-07 | 1.36 |
| TCGA-A7-A6VV-01A-22R-A33J-07 | 1.36 |
| TCGA-BH-A1EN-11A-23R-A13Q-07 | 1.36 |
| TCGA-AN-A0FX-01A-11R-A034-07 | 1.36 |
| TCGA-A2-A1FZ-01A-51R-A14D-07 | 1.35 |
| TCGA-D8-A27G-01A-11R-A16F-07 | 1.35 |
| TCGA-E2-A15D-01A-11R-A115-07 | 1.35 |
| TCGA-A2-A0YL-01A-21R-A109-07 | 1.35 |
| TCGA-BH-A0DP-01A-21R-A056-07 | 1.34 |
| TCGA-EW-A1P1-01A-31R-A14D-07 | 1.34 |
| TCGA-A7-A0DA-01A-31R-A115-07 | 1.34 |
| TCGA-A2-A0EM-01A-11R-A034-07 | 1.34 |
| TCGA-E9-A1R0-01A-22R-A16F-07 | 1.34 |
| TCGA-AQ-A1H3-01A-31R-A13Q-07 | 1.34 |
| TCGA-A8-A076-01A-21R-A00Z-07 | 1.33 |
| TCGA-E2-A3DX-01A-21R-A213-07 | 1.33 |
| TCGA-A7-A0DC-11A-41R-A089-07 | 1.33 |
| TCGA-AQ-A0Y5-01A-11R-A14M-07 | 1.33 |
| TCGA-BH-A1FU-11A-23R-A14D-07 | 1.32 |
| TCGA-D8-A1JP-01A-11R-A13Q-07 | 1.32 |
| TCGA-D8-A1XO-01A-11R-A14M-07 | 1.31 |
| TCGA-AC-A23H-11A-12R-A157-07 | 1.31 |
| TCGA-A2-A0CS-01A-11R-A115-07 | 1.31 |
| TCGA-BH-A28O-01A-11R-A22K-07 | 1.31 |
| TCGA-E2-A1B1-01A-21R-A12P-07 | 1.31 |
| TCGA-5L-AAT0-01A-12R-A41B-07 | 1.31 |
| TCGA-B6-A0IH-01A-11R-A115-07 | 1.31 |
| TCGA-AC-A5EH-01A-11R-A28M-07 | 1.31 |
| TCGA-BH-A0C1-01B-11R-A12D-07 | 1.3 |
| TCGA-A8-A09R-01A-11R-A00Z-07 | 1.3 |
| TCGA-BH-A1EV-11A-24R-A137-07 | 1.3 |
| TCGA-BH-A0B0-01A-21R-A115-07 | 1.3 |
| TCGA-BH-A0BJ-01A-11R-A056-07 | 1.3 |
| TCGA-LL-A440-01A-11R-A24H-07 | 1.3 |
| TCGA-XX-A899-01A-11R-A36F-07 | 1.3 |
| TCGA-BH-A1F6-11B-94R-A13Q-07 | 1.3 |
| TCGA-BH-A0E2-01A-11R-A056-07 | 1.3 |
| TCGA-BH-A18F-01A-11R-A12D-07 | 1.3 |
| TCGA-A2-A0CZ-01A-11R-A034-07 | 1.29 |
| TCGA-BH-A0BJ-11A-23R-A089-07 | 1.29 |
| TCGA-BH-A0DT-01A-21R-A12D-07 | 1.29 |
| TCGA-AR-A24X-01A-11R-A169-07 | 1.28 |
| TCGA-LL-A73Y-01A-11R-A33J-07 | 1.28 |
| TCGA-AC-A6IV-01A-12R-A33J-07 | 1.28 |
| TCGA-AC-A2B8-01A-11R-A17B-07 | 1.28 |
| TCGA-A2-A3KC-01A-11R-A213-07 | 1.28 |
| TCGA-E9-A1NI-01A-11R-A14D-07 | 1.28 |
| TCGA-BH-A1FH-11B-42R-A13Q-07 | 1.28 |
| TCGA-AN-A0XO-01A-11R-A109-07 | 1.28 |
| TCGA-MS-A51U-01A-31R-A266-07 | 1.27 |
| TCGA-E2-A1L8-01A-11R-A13Q-07 | 1.27 |
| TCGA-AR-A1AU-01A-11R-A12P-07 | 1.27 |
| TCGA-AC-A3W7-01A-11R-A22K-07 | 1.27 |
| TCGA-A1-A0SN-01A-11R-A144-07 | 1.27 |
| TCGA-E2-A1AZ-01A-11R-A12P-07 | 1.27 |
| TCGA-A8-A095-01A-11R-A00Z-07 | 1.27 |
| TCGA-A8-A09T-01A-11R-A00Z-07 | 1.27 |
| TCGA-A7-A0CD-01A-11R-A00Z-07 | 1.27 |
| TCGA-AO-A0JM-01A-21R-A056-07 | 1.27 |
| TCGA-A8-A09D-01A-11R-A00Z-07 | 1.27 |
| TCGA-BH-A1EU-11A-23R-A137-07 | 1.27 |
| TCGA-A8-A0A4-01A-11R-A00Z-07 | 1.27 |
| TCGA-BH-A0HK-11A-11R-A089-07 | 1.26 |
| TCGA-A2-A0EU-01A-22R-A056-07 | 1.26 |
| TCGA-AN-A0XW-01A-11R-A109-07 | 1.26 |
| TCGA-AC-A3BB-01A-21R-A19W-07 | 1.26 |
| TCGA-BH-A0C7-01B-11R-A115-07 | 1.26 |
| TCGA-D8-A1X9-01A-12R-A157-07 | 1.26 |
| TCGA-GM-A2DL-01A-11R-A18M-07 | 1.26 |
| TCGA-BH-A1FM-01A-11R-A13Q-07 | 1.26 |
| TCGA-D8-A1XM-01A-21R-A14M-07 | 1.25 |
| TCGA-D8-A27N-01A-11R-A16F-07 | 1.25 |
| TCGA-D8-A27K-01A-11R-A16F-07 | 1.25 |
| TCGA-A7-A13D-01A-13R-A277-07 | 1.25 |
| TCGA-BH-A1F8-11B-21R-A13Q-07 | 1.25 |
| TCGA-AO-A12A-01A-21R-A115-07 | 1.25 |
| TCGA-OL-A6VQ-01A-12R-A41B-07 | 1.25 |
| TCGA-A8-A07L-01A-11R-A00Z-07 | 1.24 |
| TCGA-E9-A1RB-01A-11R-A157-07 | 1.24 |
| TCGA-BH-A0DZ-01A-11R-A00Z-07 | 1.24 |
| TCGA-A2-A1FX-01A-11R-A13Q-07 | 1.24 |
| TCGA-C8-A12O-01A-11R-A115-07 | 1.24 |
| TCGA-A8-A07F-01A-11R-A00Z-07 | 1.24 |
| TCGA-BH-A0BL-01A-11R-A115-07 | 1.24 |
| TCGA-AR-A24N-01A-11R-A169-07 | 1.24 |
| TCGA-E2-A1IG-11A-22R-A144-07 | 1.24 |
| TCGA-E9-A1RA-01A-11R-A14D-07 | 1.24 |
| TCGA-BH-A1FM-11B-23R-A13Q-07 | 1.24 |
| TCGA-A8-A07J-01A-11R-A00Z-07 | 1.24 |
| TCGA-AO-A1KT-01A-11R-A13Q-07 | 1.24 |
| TCGA-BH-A5IZ-01A-11R-A27Q-07 | 1.24 |
| TCGA-D8-A1JC-01A-11R-A13Q-07 | 1.23 |
| TCGA-A8-A0AB-01A-11R-A034-07 | 1.23 |
| TCGA-E2-A15M-11A-22R-A12D-07 | 1.23 |
| TCGA-BH-A18L-11A-42R-A12D-07 | 1.23 |
| TCGA-BH-A0AZ-01A-21R-A12P-07 | 1.23 |
| TCGA-E2-A15H-01A-11R-A12D-07 | 1.23 |
| TCGA-LD-A74U-01A-13R-A33J-07 | 1.22 |
| TCGA-E9-A1NG-11A-52R-A14M-07 | 1.22 |
| TCGA-E2-A10B-01A-11R-A10J-07 | 1.22 |
| TCGA-A2-A3XY-01A-11R-A239-07 | 1.22 |
| TCGA-E9-A1R7-11A-42R-A14M-07 | 1.22 |
| TCGA-A8-A0A9-01A-11R-A00Z-07 | 1.22 |
| TCGA-AC-A2FF-01A-11R-A17B-07 | 1.22 |
| TCGA-D8-A1XT-01A-11R-A14M-07 | 1.22 |
| TCGA-E9-A1RC-01A-11R-A157-07 | 1.22 |
| TCGA-AR-A24Q-01A-12R-A169-07 | 1.22 |
| TCGA-BH-A0E7-01A-11R-A034-07 | 1.21 |
| TCGA-A8-A0A2-01A-11R-A034-07 | 1.21 |
| TCGA-B6-A0WY-01A-11R-A109-07 | 1.21 |
| TCGA-B6-A0IM-01A-11R-A034-07 | 1.21 |
| TCGA-A8-A096-01A-11R-A00Z-07 | 1.21 |
| TCGA-BH-A0DE-01A-11R-A115-07 | 1.21 |
| TCGA-A8-A09A-01A-11R-A00Z-07 | 1.21 |
| TCGA-AO-A03L-01A-41R-A056-07 | 1.21 |
| TCGA-A7-A0D9-01A-31R-A056-07 | 1.2 |
| TCGA-B6-A40B-01A-11R-A239-07 | 1.2 |
| TCGA-E9-A295-01A-11R-A16F-07 | 1.2 |
| TCGA-AR-A2LK-01A-11R-A180-07 | 1.2 |
| TCGA-BH-A1FE-01A-11R-A13Q-07 | 1.2 |
| TCGA-AC-A6NO-01A-12R-A33J-07 | 1.2 |
| TCGA-BH-A0AY-01A-21R-A00Z-07 | 1.2 |
| TCGA-E9-A1RH-11A-34R-A169-07 | 1.2 |
| TCGA-A7-A13E-01A-11R-A277-07 | 1.19 |
| TCGA-B6-A0RP-01A-21R-A084-07 | 1.19 |
| TCGA-A8-A08T-01A-21R-A00Z-07 | 1.19 |
| TCGA-BH-A0GZ-01A-11R-A056-07 | 1.19 |
| TCGA-E9-A1RD-11A-33R-A157-07 | 1.19 |
| TCGA-BH-A18K-11A-13R-A12D-07 | 1.19 |
| TCGA-A7-A426-01A-22R-A24H-07 | 1.19 |
| TCGA-EW-A6S9-01A-22R-A33J-07 | 1.19 |
| TCGA-BH-A1FJ-11B-42R-A13Q-07 | 1.19 |
| TCGA-A8-A09N-01A-11R-A00Z-07 | 1.19 |
| TCGA-E9-A1R6-01A-11R-A14D-07 | 1.19 |
| TCGA-BH-A0HX-01A-21R-A056-07 | 1.19 |
| TCGA-C8-A132-01A-31R-A115-07 | 1.18 |
| TCGA-BH-A18J-01A-11R-A12D-07 | 1.18 |
| TCGA-AR-A2LO-01A-31R-A18M-07 | 1.18 |
| TCGA-GM-A3XN-01A-12R-A22U-07 | 1.18 |
| TCGA-D8-A4Z1-01A-21R-A266-07 | 1.17 |
| TCGA-OL-A66J-01A-11R-A29R-07 | 1.17 |
| TCGA-B6-A400-01A-11R-A239-07 | 1.17 |
| TCGA-A1-A0SP-01A-11R-A084-07 | 1.17 |
| TCGA-AR-A24W-01A-11R-A169-07 | 1.17 |
| TCGA-BH-A0BC-11A-22R-A089-07 | 1.17 |
| TCGA-E2-A1IJ-01A-11R-A144-07 | 1.17 |
| TCGA-BH-A0BF-01A-21R-A12P-07 | 1.17 |
| TCGA-BH-A0DT-11A-12R-A12D-07 | 1.17 |
| TCGA-A2-A0YE-01A-11R-A109-07 | 1.17 |
| TCGA-GI-A2C9-11A-22R-A21T-07 | 1.17 |
| TCGA-AN-A0FV-01A-11R-A00Z-07 | 1.17 |
| TCGA-A7-A2KD-01A-31R-A21T-07 | 1.17 |
| TCGA-BH-A1ET-11B-23R-A137-07 | 1.16 |
| TCGA-E9-A22G-01A-11R-A157-07 | 1.16 |
| TCGA-BH-A42V-01A-11R-A24H-07 | 1.16 |
| TCGA-B6-A0IP-01A-11R-A034-07 | 1.16 |
| TCGA-A8-A07I-01A-11R-A00Z-07 | 1.16 |
| TCGA-A2-A0T3-01A-21R-A115-07 | 1.16 |
| TCGA-AQ-A04J-01A-02R-A034-07 | 1.16 |
| TCGA-BH-A1EY-01A-11R-A13Q-07 | 1.15 |
| TCGA-C8-A273-01A-11R-A16F-07 | 1.15 |
| TCGA-E2-A2P5-01A-11R-A19W-07 | 1.15 |
| TCGA-A2-A0CV-01A-31R-A115-07 | 1.15 |
| TCGA-A1-A0SJ-01A-11R-A084-07 | 1.15 |
| TCGA-BH-A1FB-01A-11R-A13Q-07 | 1.15 |
| TCGA-E2-A10A-01A-21R-A115-07 | 1.15 |
| TCGA-C8-A137-01A-11R-A115-07 | 1.15 |
| TCGA-A7-A26E-01A-11R-A169-07 | 1.15 |
| TCGA-AC-A8OP-01A-11R-A36F-07 | 1.15 |
| TCGA-E2-A15C-01A-31R-A12D-07 | 1.14 |
| TCGA-D8-A13Y-01A-11R-A115-07 | 1.14 |
| TCGA-A2-A25C-01A-11R-A169-07 | 1.14 |
| TCGA-A2-A0T5-01A-21R-A084-07 | 1.14 |
| TCGA-AR-A1AN-01A-11R-A12P-07 | 1.14 |
| TCGA-AN-A0XV-01A-11R-A109-07 | 1.14 |
| TCGA-B6-A0WV-01A-11R-A109-07 | 1.14 |
| TCGA-A2-A259-01A-11R-A16F-07 | 1.14 |
| TCGA-BH-A18N-11A-43R-A12D-07 | 1.13 |
| TCGA-D8-A1XZ-01A-11R-A14M-07 | 1.13 |
| TCGA-BH-A1FL-01A-11R-A13Q-07 | 1.13 |
| TCGA-AN-A049-01A-21R-A00Z-07 | 1.13 |
| TCGA-AC-A3W5-01A-11R-A22K-07 | 1.13 |
| TCGA-OL-A66I-01A-21R-A29R-07 | 1.13 |
| TCGA-BH-A0C3-01A-21R-A12P-07 | 1.13 |
| TCGA-BH-A1EU-01A-11R-A137-07 | 1.13 |
| TCGA-BH-A0BQ-11A-33R-A115-07 | 1.13 |
| TCGA-A2-A0D2-01A-21R-A034-07 | 1.13 |
| TCGA-B6-A0RE-01A-11R-A056-07 | 1.12 |
| TCGA-XX-A89A-01A-11R-A36F-07 | 1.12 |
| TCGA-BH-A203-11A-42R-A169-07 | 1.12 |
| TCGA-A7-A13E-11A-61R-A12P-07 | 1.12 |
| TCGA-JL-A3YW-01A-12R-A239-07 | 1.12 |
| TCGA-BH-A18N-01A-11R-A12D-07 | 1.12 |
| TCGA-C8-A12W-01A-11R-A115-07 | 1.12 |
| TCGA-A7-A0CG-01A-12R-A056-07 | 1.12 |
| TCGA-A7-A0CH-01A-21R-A00Z-07 | 1.12 |
| TCGA-BH-A0BO-01A-23R-A12D-07 | 1.12 |
| TCGA-A1-A0SD-01A-11R-A115-07 | 1.12 |
| TCGA-A8-A09B-01A-11R-A00Z-07 | 1.11 |
| TCGA-BH-A18Q-11A-34R-A12D-07 | 1.11 |
| TCGA-BH-A0HQ-01A-11R-A034-07 | 1.11 |
| TCGA-A8-A07B-01A-11R-A00Z-07 | 1.11 |
| TCGA-E2-A15K-11A-13R-A12P-07 | 1.11 |
| TCGA-E9-A1R2-01A-11R-A14D-07 | 1.11 |
| TCGA-A2-A0EX-01A-21R-A034-07 | 1.11 |
| TCGA-A8-A07W-01A-11R-A00Z-07 | 1.11 |
| TCGA-A2-A25E-01A-11R-A169-07 | 1.11 |
| TCGA-BH-A1F0-11B-23R-A137-07 | 1.1 |
| TCGA-AN-A0FJ-01A-11R-A00Z-07 | 1.1 |
| TCGA-BH-A8G0-01A-11R-A352-07 | 1.1 |
| TCGA-E9-A1NF-11A-73R-A14D-07 | 1.1 |
| TCGA-E9-A2JS-01A-11R-A180-07 | 1.1 |
| TCGA-BH-A1EO-11A-31R-A137-07 | 1.1 |
| TCGA-BH-A0B8-01A-21R-A056-07 | 1.1 |
| TCGA-BH-A18U-11A-23R-A12D-07 | 1.09 |
| TCGA-A7-A0DB-01A-11R-A277-07 | 1.09 |
| TCGA-A2-A4RY-01A-31R-A266-07 | 1.09 |
| TCGA-BH-A0DV-11A-22R-A12P-07 | 1.09 |
| TCGA-AO-A1KP-01A-11R-A13Q-07 | 1.09 |
| TCGA-BH-A18J-11A-31R-A12D-07 | 1.08 |
| TCGA-AR-A251-01A-12R-A169-07 | 1.08 |
| TCGA-E9-A1NA-11A-33R-A144-07 | 1.08 |
| TCGA-BH-A1F5-01A-12R-A13Q-07 | 1.08 |
| TCGA-D8-A1XA-01A-11R-A14D-07 | 1.08 |
| TCGA-A2-A25B-01A-11R-A169-07 | 1.08 |
| TCGA-WT-AB44-01A-11R-A41B-07 | 1.08 |
| TCGA-BH-A42T-01A-11R-A24H-07 | 1.08 |
| TCGA-A8-A09W-01A-11R-A00Z-07 | 1.08 |
| TCGA-A8-A090-01A-11R-A00Z-07 | 1.08 |
| TCGA-LL-A740-01A-21R-A32P-07 | 1.08 |
| TCGA-BH-AB28-01A-31R-A41B-07 | 1.07 |
| TCGA-D8-A1Y0-01A-11R-A14M-07 | 1.07 |
| TCGA-BH-A0H5-11A-62R-A115-07 | 1.07 |
| TCGA-A7-A26I-01B-06R-A22O-07 | 1.07 |
| TCGA-AO-A0J7-01A-11R-A034-07 | 1.07 |
| TCGA-A2-A0CT-01A-31R-A056-07 | 1.07 |
| TCGA-D8-A27P-01A-11R-A16F-07 | 1.07 |
| TCGA-E2-A1LE-01A-12R-A19W-07 | 1.07 |
| TCGA-AC-A23H-01A-11R-A157-07 | 1.07 |
| TCGA-E2-A15R-01A-11R-A115-07 | 1.07 |
| TCGA-BH-A0E9-01B-11R-A115-07 | 1.07 |
| TCGA-A7-A13F-01A-11R-A12P-07 | 1.06 |
| TCGA-A7-A0CE-11A-21R-A089-07 | 1.06 |
| TCGA-BH-A0H7-11A-13R-A089-07 | 1.06 |
| TCGA-BH-A0BZ-11A-61R-A12P-07 | 1.06 |
| TCGA-E2-A1LS-11A-32R-A157-07 | 1.06 |
| TCGA-BH-A0HA-01A-11R-A12P-07 | 1.06 |
| TCGA-EW-A1IW-01A-11R-A13Q-07 | 1.06 |
| TCGA-A7-A4SC-01A-12R-A266-07 | 1.05 |
| TCGA-A2-A0SU-01A-11R-A084-07 | 1.05 |
| TCGA-BH-A1FC-11A-32R-A13Q-07 | 1.05 |
| TCGA-AC-A5XU-01A-11R-A28M-07 | 1.05 |
| TCGA-BH-A1FD-01A-11R-A13Q-07 | 1.05 |
| TCGA-OL-A5RX-01A-11R-A28M-07 | 1.05 |
| TCGA-BH-A0B7-11A-34R-A115-07 | 1.05 |
| TCGA-BH-A0C0-11A-21R-A089-07 | 1.05 |
| TCGA-AC-A23C-01A-12R-A169-07 | 1.05 |
| TCGA-E2-A1IH-01A-11R-A13Q-07 | 1.05 |
| TCGA-OL-A5RV-01A-12R-A28M-07 | 1.05 |
| TCGA-AR-A24S-01A-11R-A169-07 | 1.05 |
| TCGA-E2-A14Q-01A-11R-A12D-07 | 1.04 |
| TCGA-C8-A3M8-01A-11R-A213-07 | 1.04 |
| TCGA-BH-A0BM-11A-12R-A089-07 | 1.04 |
| TCGA-E9-A1RC-11A-33R-A157-07 | 1.04 |
| TCGA-BH-A209-11A-42R-A157-07 | 1.04 |
| TCGA-BH-A0DH-11A-31R-A089-07 | 1.03 |
| TCGA-BH-A1F2-11A-32R-A13Q-07 | 1.03 |
| TCGA-GM-A3XG-01A-31R-A24H-07 | 1.03 |
| TCGA-E9-A1N9-01A-11R-A14D-07 | 1.03 |
| TCGA-A8-A08J-01A-11R-A00Z-07 | 1.03 |
| TCGA-A2-A0CK-01A-11R-A22K-07 | 1.03 |
| TCGA-EW-A1PF-01A-11R-A144-07 | 1.03 |
| TCGA-A2-A0SV-01A-11R-A084-07 | 1.03 |
| TCGA-BH-A1EV-01A-11R-A137-07 | 1.03 |
| TCGA-AO-A03V-01A-11R-A115-07 | 1.03 |
| TCGA-AO-A0JG-01A-31R-A084-07 | 1.03 |
| TCGA-EW-A1PC-01B-11R-A21T-07 | 1.03 |
| TCGA-AO-A1KS-01A-11R-A13Q-07 | 1.03 |
| TCGA-AR-A24M-01A-11R-A169-07 | 1.02 |
| TCGA-A2-A0CX-01A-21R-A00Z-07 | 1.02 |
| TCGA-E2-A109-01A-11R-A10J-07 | 1.02 |
| TCGA-BH-A0DG-11A-43R-A12P-07 | 1.02 |
| TCGA-B6-A0WW-01A-11R-A109-07 | 1.02 |
| TCGA-AR-A5QP-01A-11R-A28M-07 | 1.02 |
| TCGA-A7-A13F-11A-42R-A12P-07 | 1.02 |
| TCGA-BH-A0HF-01A-11R-A056-07 | 1.02 |
| TCGA-A8-A082-01A-11R-A00Z-07 | 1.02 |
| TCGA-A2-A1FV-01A-11R-A13Q-07 | 1.02 |
| TCGA-GM-A2DA-01A-11R-A18M-07 | 1.02 |
| TCGA-BH-A0DP-11A-12R-A089-07 | 1.02 |
| TCGA-BH-A1FD-11B-21R-A13Q-07 | 1.02 |
| TCGA-AC-A2BM-01A-11R-A21T-07 | 1.02 |
| TCGA-S3-AA11-01A-31R-A41B-07 | 1.02 |
| TCGA-E9-A1RF-11A-32R-A157-07 | 1.02 |
| TCGA-BH-A0DS-01A-11R-A056-07 | 1.01 |
| TCGA-BH-A0EB-01A-11R-A034-07 | 1.01 |
| TCGA-GI-A2C9-01A-11R-A21T-07 | 1.01 |
| TCGA-LL-A441-01A-11R-A24H-07 | 1.01 |
| TCGA-D8-A1XY-01A-11R-A14M-07 | 1.01 |
| TCGA-C8-A1HN-01A-11R-A137-07 | 1.01 |
| TCGA-AR-A0TP-01A-11R-A084-07 | 1.01 |
| TCGA-E9-A1NA-01A-11R-A144-07 | 1.01 |
| TCGA-E9-A1RB-11A-33R-A157-07 | 1.01 |
| TCGA-C8-A26Z-01A-11R-A16F-07 | 1 |
| TCGA-BH-A1EX-01A-11R-A13Q-07 | 1 |
| TCGA-AC-A2FO-01A-11R-A180-07 | 1 |
| TCGA-BH-A0DX-01A-11R-A115-07 | 1 |
| TCGA-JL-A3YX-01A-11R-A22U-07 | 1 |
| TCGA-A2-A0YC-01A-11R-A109-07 | 1 |
| TCGA-A7-A425-01A-11R-A24H-07 | 1 |
| TCGA-AR-A0TU-01A-31R-A109-07 | 1 |
| TCGA-BH-A0W5-01A-11R-A109-07 | 1 |
| TCGA-BH-A0B3-11B-21R-A089-07 | 1 |
| TCGA-E2-A14V-01A-11R-A12D-07 | 1 |
| TCGA-A7-A0CH-11A-32R-A089-07 | 1 |
| TCGA-C8-A26W-01A-11R-A16F-07 | 0.99 |
| TCGA-BH-A0B8-11A-41R-A089-07 | 0.99 |
| TCGA-BH-A0HI-01A-11R-A084-07 | 0.99 |
| TCGA-AR-A1AM-01A-41R-A22K-07 | 0.99 |
| TCGA-BH-A0BC-01A-22R-A084-07 | 0.99 |
| TCGA-AN-A0FW-01A-11R-A034-07 | 0.99 |
| TCGA-BH-A0BD-01A-11R-A034-07 | 0.99 |
| TCGA-E9-A1RE-01A-11R-A157-07 | 0.99 |
| TCGA-PL-A8LZ-01A-31R-A36F-07 | 0.99 |
| TCGA-E9-A1RG-01A-11R-A14D-07 | 0.99 |
| TCGA-AC-A2FK-01A-12R-A180-07 | 0.98 |
| TCGA-A8-A099-01A-11R-A00Z-07 | 0.98 |
| TCGA-E2-A15F-01A-11R-A115-07 | 0.98 |
| TCGA-AO-A0JE-01A-11R-A056-07 | 0.98 |
| TCGA-A8-A08G-01A-11R-A00Z-07 | 0.98 |
| TCGA-EW-A1PA-01A-11R-A144-07 | 0.98 |
| TCGA-A8-A07P-01A-11R-A00Z-07 | 0.98 |
| TCGA-A2-A0CU-01A-12R-A034-07 | 0.98 |
| TCGA-E2-A15M-01A-11R-A12D-07 | 0.98 |
| TCGA-AC-A2FB-11A-13R-A17B-07 | 0.98 |
| TCGA-BH-A18P-11A-43R-A12D-07 | 0.98 |
| TCGA-AR-A0U4-01A-11R-A109-07 | 0.98 |
| TCGA-AR-A24R-01A-11R-A169-07 | 0.98 |
| TCGA-LD-A66U-01A-11R-A31O-07 | 0.98 |
| TCGA-E2-A1BD-01A-11R-A12P-07 | 0.98 |
| TCGA-A2-A0ES-01A-11R-A115-07 | 0.98 |
| TCGA-BH-A18U-01A-21R-A12D-07 | 0.97 |
| TCGA-A1-A0SO-01A-22R-A084-07 | 0.97 |
| TCGA-BH-A1FR-11B-42R-A13Q-07 | 0.97 |
| TCGA-C8-A1HI-01A-11R-A137-07 | 0.97 |
| TCGA-AR-A24K-01A-11R-A169-07 | 0.97 |
| TCGA-AO-A0J6-01A-11R-A034-07 | 0.97 |
| TCGA-A8-A092-01A-11R-A00Z-07 | 0.97 |
| TCGA-AC-A2FF-11A-13R-A17B-07 | 0.97 |
| TCGA-E2-A1LB-01A-11R-A144-07 | 0.97 |
| TCGA-EW-A1OY-01A-11R-A144-07 | 0.97 |
| TCGA-E2-A15G-01A-11R-A12D-07 | 0.97 |
| TCGA-BH-A0DZ-11A-22R-A089-07 | 0.97 |
| TCGA-A7-A3IZ-01A-11R-A213-07 | 0.97 |
| TCGA-PE-A5DD-01A-12R-A27Q-07 | 0.97 |
| TCGA-A8-A08F-01A-11R-A00Z-07 | 0.97 |
| TCGA-E2-A1LB-11A-22R-A144-07 | 0.96 |
| TCGA-AN-A0XS-01A-22R-A109-07 | 0.96 |
| TCGA-AC-A2FM-11B-32R-A19W-07 | 0.96 |
| TCGA-BH-A0DQ-11A-12R-A089-07 | 0.96 |
| TCGA-AO-A12F-01A-11R-A115-07 | 0.96 |
| TCGA-PE-A5DC-01A-12R-A27Q-07 | 0.95 |
| TCGA-A2-A1G6-01A-11R-A13Q-07 | 0.95 |
| TCGA-OL-A5DA-01A-11R-A27Q-07 | 0.95 |
| TCGA-E9-A1N6-11A-32R-A144-07 | 0.95 |
| TCGA-BH-A1FN-01A-11R-A13Q-07 | 0.95 |
| TCGA-E9-A247-01A-11R-A169-07 | 0.95 |
| TCGA-BH-A0H9-01A-11R-A056-07 | 0.95 |
| TCGA-EW-A1IY-01A-11R-A13Q-07 | 0.95 |
| TCGA-A8-A06O-01A-11R-A00Z-07 | 0.95 |
| TCGA-E2-A1BC-11A-32R-A12P-07 | 0.95 |
| TCGA-BH-A0BZ-01A-31R-A12P-07 | 0.95 |
| TCGA-A2-A1FW-01A-11R-A13Q-07 | 0.94 |
| TCGA-AN-A0AL-01A-11R-A00Z-07 | 0.94 |
| TCGA-E2-A153-11A-31R-A12D-07 | 0.94 |
| TCGA-AC-A2BK-01A-11R-A21T-07 | 0.94 |
| TCGA-BH-A0E0-11A-13R-A089-07 | 0.94 |
| TCGA-A7-A0CE-01A-11R-A00Z-07 | 0.94 |
| TCGA-A2-A0T0-01A-22R-A084-07 | 0.94 |
| TCGA-E2-A15O-01A-11R-A115-07 | 0.94 |
| TCGA-E2-A105-01A-11R-A10J-07 | 0.94 |
| TCGA-E2-A15A-01A-11R-A12D-07 | 0.94 |
| TCGA-BH-A0W7-01A-11R-A115-07 | 0.94 |
| TCGA-A8-A079-01A-21R-A00Z-07 | 0.94 |
| TCGA-BH-A0HA-11A-31R-A12P-07 | 0.94 |
| TCGA-B6-A0RG-01A-11R-A056-07 | 0.94 |
| TCGA-A7-A3J1-01A-11R-A213-07 | 0.93 |
| TCGA-E2-A15K-01A-11R-A12P-07 | 0.93 |
| TCGA-E2-A1L7-11A-33R-A144-07 | 0.93 |
| TCGA-E9-A1RD-01A-11R-A157-07 | 0.93 |
| TCGA-BH-A42U-01A-12R-A24H-07 | 0.93 |
| TCGA-A8-A06T-01A-11R-A00Z-07 | 0.93 |
| TCGA-D8-A3Z6-01A-11R-A239-07 | 0.93 |
| TCGA-BH-A0HU-01A-11R-A034-07 | 0.93 |
| TCGA-A2-A0CO-01A-13R-A22K-07 | 0.93 |
| TCGA-AO-A0J4-01A-11R-A034-07 | 0.93 |
| TCGA-EW-A1P3-01A-11R-A144-07 | 0.93 |
| TCGA-3C-AAAU-01A-11R-A41B-07 | 0.93 |
| TCGA-A7-A0CJ-01A-21R-A00Z-07 | 0.93 |
| TCGA-A2-A04P-01A-31R-A034-07 | 0.93 |
| TCGA-E9-A1N8-01A-11R-A144-07 | 0.93 |
| TCGA-E2-A1B0-01A-11R-A12P-07 | 0.93 |
| TCGA-E2-A15P-01A-11R-A115-07 | 0.92 |
| TCGA-B6-A0RQ-01A-11R-A115-07 | 0.92 |
| TCGA-E2-A156-01A-11R-A12D-07 | 0.92 |
| TCGA-E9-A3QA-01A-61R-A22K-07 | 0.92 |
| TCGA-E2-A1L6-01A-11R-A13Q-07 | 0.92 |
| TCGA-A8-A07S-01A-11R-A034-07 | 0.92 |
| TCGA-B6-A401-01A-11R-A239-07 | 0.92 |
| TCGA-BH-A1FJ-01A-11R-A13Q-07 | 0.92 |
| TCGA-BH-A0GY-01A-11R-A056-07 | 0.92 |
| TCGA-BH-A1EW-01A-11R-A137-07 | 0.92 |
| TCGA-AR-A1AR-01A-31R-A137-07 | 0.92 |
| TCGA-E2-A15J-01A-11R-A12P-07 | 0.91 |
| TCGA-AC-A3QP-01A-11R-A22U-07 | 0.91 |
| TCGA-A8-A08C-01A-11R-A00Z-07 | 0.91 |
| TCGA-B6-A0RM-01A-11R-A084-07 | 0.91 |
| TCGA-AC-A4ZE-01A-11R-A41B-07 | 0.91 |
| TCGA-BH-A0HP-01A-12R-A084-07 | 0.91 |
| TCGA-AQ-A04H-01B-11R-A10J-07 | 0.91 |
| TCGA-BH-A0H9-11A-22R-A466-07 | 0.91 |
| TCGA-BH-A0BV-01A-11R-A00Z-07 | 0.91 |
| TCGA-E2-A15I-11A-32R-A137-07 | 0.91 |
| TCGA-A7-A4SA-01A-11R-A266-07 | 0.91 |
| TCGA-E9-A6HE-01A-11R-A31O-07 | 0.9 |
| TCGA-D8-A27R-01A-11R-A16F-07 | 0.9 |
| TCGA-AN-A0AT-01A-11R-A034-07 | 0.9 |
| TCGA-BH-A0B5-11A-23R-A12P-07 | 0.9 |
| TCGA-A2-A04U-01A-11R-A115-07 | 0.9 |
| TCGA-E9-A1QZ-01A-21R-A169-07 | 0.9 |
| TCGA-E2-A14U-01A-11R-A22K-07 | 0.9 |
| TCGA-C8-A1HF-01A-11R-A137-07 | 0.9 |
| TCGA-E9-A244-01A-11R-A169-07 | 0.9 |
| TCGA-BH-A0BT-01A-11R-A12P-07 | 0.9 |
| TCGA-E9-A249-01A-11R-A169-07 | 0.89 |
| TCGA-B6-A0I8-01A-11R-A034-07 | 0.89 |
| TCGA-C8-A1HJ-01A-11R-A13Q-07 | 0.89 |
| TCGA-AN-A03Y-01A-21R-A00Z-07 | 0.89 |
| TCGA-S3-A6ZF-01A-32R-A32P-07 | 0.89 |
| TCGA-AN-A0FZ-01A-11R-A034-07 | 0.89 |
| TCGA-PL-A8LY-01A-11R-A41B-07 | 0.89 |
| TCGA-A2-A3XU-01A-12R-A22U-07 | 0.89 |
| TCGA-A2-A0EP-01A-52R-A22U-07 | 0.89 |
| TCGA-E9-A1R7-01A-11R-A14M-07 | 0.89 |
| TCGA-EW-A1P6-01A-11R-A144-07 | 0.89 |
| TCGA-A8-A0A1-01A-11R-A00Z-07 | 0.88 |
| TCGA-AO-A03P-01A-11R-A00Z-07 | 0.88 |
| TCGA-C8-A27A-01A-11R-A169-07 | 0.88 |
| TCGA-A8-A07C-01A-11R-A034-07 | 0.88 |
| TCGA-BH-A0HL-01A-11R-A10U-07 | 0.88 |
| TCGA-C8-A12Y-01A-11R-A12D-07 | 0.88 |
| TCGA-AR-A1AX-01A-11R-A12P-07 | 0.88 |
| TCGA-E9-A1RI-11A-41R-A169-07 | 0.88 |
| TCGA-BH-A5J0-01A-11R-A27Q-07 | 0.88 |
| TCGA-BH-A0AU-11A-11R-A12P-07 | 0.88 |
| TCGA-A8-A09E-01A-11R-A00Z-07 | 0.87 |
| TCGA-A7-A0D9-11A-53R-A089-07 | 0.87 |
| TCGA-A2-A0YK-01A-22R-A109-07 | 0.87 |
| TCGA-B6-A2IU-01A-32R-A18M-07 | 0.87 |
| TCGA-EW-A3E8-01B-11R-A24H-07 | 0.87 |
| TCGA-BH-A18V-11A-52R-A12D-07 | 0.87 |
| TCGA-W8-A86G-01A-21R-A36F-07 | 0.87 |
| TCGA-AR-A1AH-01A-11R-A12D-07 | 0.87 |
| TCGA-B6-A0X5-01A-21R-A109-07 | 0.87 |
| TCGA-GM-A2DK-01A-21R-A180-07 | 0.87 |
| TCGA-A1-A0SF-01A-11R-A144-07 | 0.87 |
| TCGA-A2-A0D1-01A-11R-A034-07 | 0.87 |
| TCGA-AO-A03N-01B-11R-A10J-07 | 0.86 |
| TCGA-AR-A0U2-01A-11R-A109-07 | 0.86 |
| TCGA-C8-A138-01A-11R-A115-07 | 0.86 |
| TCGA-LD-A7W6-01A-81R-A352-07 | 0.86 |
| TCGA-EW-A1OZ-01A-11R-A144-07 | 0.86 |
| TCGA-A7-A4SF-01A-11R-A266-07 | 0.86 |
| TCGA-D8-A1X5-01A-11R-A14D-07 | 0.86 |
| TCGA-AO-A0J8-01A-21R-A034-07 | 0.86 |
| TCGA-EW-A1J3-01A-11R-A13Q-07 | 0.86 |
| TCGA-BH-A0HW-01A-11R-A034-07 | 0.85 |
| TCGA-EW-A1P0-01A-11R-A144-07 | 0.85 |
| TCGA-D8-A1J9-01A-11R-A13Q-07 | 0.85 |
| TCGA-AQ-A04L-01B-21R-A10J-07 | 0.85 |
| TCGA-A7-A0DB-11A-33R-A089-07 | 0.85 |
| TCGA-C8-A135-01A-11R-A115-07 | 0.85 |
| TCGA-BH-A1FE-11B-14R-A13Q-07 | 0.85 |
| TCGA-AN-A0AK-01A-21R-A00Z-07 | 0.84 |
| TCGA-OL-A6VR-01A-32R-A33J-07 | 0.84 |
| TCGA-LL-A73Z-01A-11R-A32P-07 | 0.84 |
| TCGA-BH-A0DO-11A-22R-A12D-07 | 0.84 |
| TCGA-AR-A1AS-01A-11R-A12P-07 | 0.84 |
| TCGA-BH-A18R-01A-11R-A12D-07 | 0.84 |
| TCGA-BH-A0AY-11A-23R-A089-07 | 0.84 |
| TCGA-EW-A1J1-01A-11R-A13Q-07 | 0.84 |
| TCGA-A2-A0SY-01A-31R-A084-07 | 0.84 |
| TCGA-S3-AA12-01A-11R-A41B-07 | 0.84 |
| TCGA-AN-A0XT-01A-11R-A109-07 | 0.83 |
| TCGA-BH-A18P-01A-11R-A12D-07 | 0.83 |
| TCGA-5L-AAT1-01A-12R-A41B-07 | 0.83 |
| TCGA-BH-A18R-11A-42R-A12D-07 | 0.83 |
| TCGA-A2-A0YM-01A-11R-A109-07 | 0.83 |
| TCGA-AN-A04D-01A-21R-A034-07 | 0.82 |
| TCGA-A8-A084-01A-21R-A00Z-07 | 0.82 |
| TCGA-C8-A134-01A-11R-A115-07 | 0.82 |
| TCGA-A8-A08P-01A-11R-A00Z-07 | 0.82 |
| TCGA-V7-A7HQ-01A-11R-A33J-07 | 0.82 |
| TCGA-E2-A14Z-01A-11R-A115-07 | 0.82 |
| TCGA-BH-A2L8-01A-11R-A18M-07 | 0.82 |
| TCGA-BH-A1F8-01A-11R-A13Q-07 | 0.82 |
| TCGA-S3-AA0Z-01A-11R-A41B-07 | 0.82 |
| TCGA-BH-A0BS-11A-11R-A12P-07 | 0.82 |
| TCGA-E2-A108-01A-13R-A10J-07 | 0.82 |
| TCGA-E2-A1IF-01A-11R-A144-07 | 0.82 |
| TCGA-A2-A1G1-01A-21R-A13Q-07 | 0.82 |
| TCGA-BH-A0DK-01A-21R-A056-07 | 0.82 |
| TCGA-A2-A1G0-01A-11R-A13Q-07 | 0.82 |
| TCGA-BH-A208-11A-51R-A157-07 | 0.82 |
| TCGA-EW-A1P8-01A-11R-A144-07 | 0.82 |
| TCGA-AR-A0TS-01A-11R-A115-07 | 0.82 |
| TCGA-B6-A0I5-01A-11R-A034-07 | 0.82 |
| TCGA-AN-A0AR-01A-11R-A00Z-07 | 0.82 |
| TCGA-BH-A18Q-01A-12R-A12D-07 | 0.82 |
| TCGA-E2-A1L7-01A-11R-A144-07 | 0.81 |
| TCGA-AQ-A1H2-01A-11R-A13Q-07 | 0.81 |
| TCGA-D8-A27V-01A-12R-A17B-07 | 0.81 |
| TCGA-AO-A0J3-01A-11R-A034-07 | 0.81 |
| TCGA-OL-A66O-01A-11R-A31O-07 | 0.81 |
| TCGA-GM-A4E0-01A-12R-A266-07 | 0.81 |
| TCGA-E2-A1LH-11A-22R-A14D-07 | 0.81 |
| TCGA-A2-A0YG-01A-21R-A109-07 | 0.8 |
| TCGA-E2-A158-01A-11R-A12D-07 | 0.8 |
| TCGA-A2-A0D3-01A-11R-A115-07 | 0.8 |
| TCGA-C8-A12P-01A-11R-A115-07 | 0.8 |
| TCGA-B6-A0IK-01A-12R-A056-07 | 0.8 |
| TCGA-HN-A2NL-01A-11R-A18M-07 | 0.8 |
| TCGA-E2-A14N-01A-31R-A137-07 | 0.8 |
| TCGA-E9-A1N9-11A-71R-A14D-07 | 0.8 |
| TCGA-A2-A4S3-01A-21R-A266-07 | 0.8 |
| TCGA-E2-A14O-01A-31R-A115-07 | 0.8 |
| TCGA-AR-A1AI-01A-11R-A12P-07 | 0.8 |
| TCGA-B6-A0IC-01A-11R-A034-07 | 0.8 |
| TCGA-E2-A15S-01A-11R-A115-07 | 0.8 |
| TCGA-AR-A256-01A-11R-A169-07 | 0.8 |
| TCGA-E9-A1N4-11A-33R-A14M-07 | 0.8 |
| TCGA-AC-A3TM-01A-11R-A22K-07 | 0.8 |
| TCGA-BH-A0BT-11A-21R-A12P-07 | 0.8 |
| TCGA-BH-A8FZ-01A-11R-A352-07 | 0.79 |
| TCGA-B6-A402-01A-11R-A239-07 | 0.79 |
| TCGA-D8-A1X8-01A-11R-A14M-07 | 0.79 |
| TCGA-A2-A0YT-01A-11R-A109-07 | 0.79 |
| TCGA-BH-A0HB-01A-11R-A056-07 | 0.79 |
| TCGA-A8-A0AD-01A-11R-A056-07 | 0.79 |
| TCGA-D8-A1Y2-01A-11R-A157-07 | 0.79 |
| TCGA-C8-A12M-01A-11R-A115-07 | 0.79 |
| TCGA-A7-A26H-01A-11R-A169-07 | 0.79 |
| TCGA-A2-A0ET-01A-31R-A034-07 | 0.79 |
| TCGA-AO-A129-01A-21R-A10J-07 | 0.79 |
| TCGA-B6-A0IG-01A-11R-A034-07 | 0.79 |
| TCGA-D8-A142-01A-11R-A115-07 | 0.78 |
| TCGA-A2-A04T-01A-21R-A034-07 | 0.78 |
| TCGA-E2-A15T-01A-11R-A115-07 | 0.78 |
| TCGA-A8-A07Z-01A-11R-A00Z-07 | 0.78 |
| TCGA-A8-A083-01A-21R-A00Z-07 | 0.78 |
| TCGA-A2-A0YH-01A-11R-A109-07 | 0.78 |
| TCGA-B6-A1KN-01A-11R-A13Q-07 | 0.78 |
| TCGA-E2-A1IE-01A-11R-A13Q-07 | 0.78 |
| TCGA-D8-A1JI-01A-11R-A13Q-07 | 0.77 |
| TCGA-B6-A0IQ-01A-11R-A034-07 | 0.77 |
| TCGA-A8-A07O-01A-11R-A00Z-07 | 0.77 |
| TCGA-A2-A0D0-01A-11R-A00Z-07 | 0.77 |
| TCGA-EW-A1PH-01A-11R-A14M-07 | 0.77 |
| TCGA-A7-A13G-11A-51R-A13Q-07 | 0.77 |
| TCGA-D8-A1JM-01A-11R-A13Q-07 | 0.77 |
| TCGA-AR-A0TQ-01A-11R-A084-07 | 0.77 |
| TCGA-BH-A1EW-11B-33R-A137-07 | 0.77 |
| TCGA-BH-A0BA-01A-11R-A056-07 | 0.77 |
| TCGA-3C-AALJ-01A-31R-A41B-07 | 0.77 |
| TCGA-BH-A18V-01A-11R-A12D-07 | 0.77 |
| TCGA-E9-A227-01A-11R-A157-07 | 0.77 |
| TCGA-A2-A4S2-01A-12R-A266-07 | 0.77 |
| TCGA-D8-A1XK-01A-21R-A14M-07 | 0.76 |
| TCGA-D8-A13Z-01A-11R-A115-07 | 0.76 |
| TCGA-OL-A5D8-01A-11R-A27Q-07 | 0.76 |
| TCGA-BH-A0E1-11A-13R-A089-07 | 0.76 |
| TCGA-AR-A2LE-01A-11R-A180-07 | 0.76 |
| TCGA-OL-A66L-01A-12R-A31O-07 | 0.76 |
| TCGA-AR-A0TY-01A-12R-A115-07 | 0.76 |
| TCGA-OL-A5S0-01A-11R-A28M-07 | 0.76 |
| TCGA-A8-A06R-01A-11R-A00Z-07 | 0.76 |
| TCGA-AO-A0JD-01A-11R-A056-07 | 0.76 |
| TCGA-E9-A243-01A-21R-A169-07 | 0.76 |
| TCGA-AC-A8OS-01A-12R-A41B-07 | 0.76 |
| TCGA-AR-A2LL-01A-11R-A180-07 | 0.75 |
| TCGA-AO-A0JL-01A-11R-A056-07 | 0.75 |
| TCGA-A2-A0SX-01A-12R-A084-07 | 0.75 |
| TCGA-BH-A0HK-01A-11R-A056-07 | 0.75 |
| TCGA-BH-A1FG-11B-12R-A13Q-07 | 0.75 |
| TCGA-BH-A0W3-01A-11R-A109-07 | 0.75 |
| TCGA-E2-A574-01A-11R-A29R-07 | 0.75 |
| TCGA-C8-A12K-01A-21R-A115-07 | 0.75 |
| TCGA-GM-A2DI-01A-31R-A18M-07 | 0.75 |
| TCGA-BH-A0HY-01A-11R-A056-07 | 0.75 |
| TCGA-AN-A0FF-01A-11R-A034-07 | 0.75 |
| TCGA-AR-A1AK-01A-21R-A12P-07 | 0.75 |
| TCGA-EW-A1J6-01A-11R-A13Q-07 | 0.75 |
| TCGA-E9-A3HO-01A-11R-A213-07 | 0.74 |
| TCGA-A8-A09X-01A-11R-A00Z-07 | 0.74 |
| TCGA-A2-A0EV-01A-11R-A034-07 | 0.74 |
| TCGA-E2-A107-01A-11R-A10J-07 | 0.74 |
| TCGA-BH-A1FB-11A-33R-A13Q-07 | 0.74 |
| TCGA-OL-A5RY-01A-21R-A28M-07 | 0.74 |
| TCGA-E2-A1LL-01A-11R-A144-07 | 0.74 |
| TCGA-GM-A2DD-01A-11R-A180-07 | 0.74 |
| TCGA-AC-A2FE-01A-11R-A19W-07 | 0.74 |
| TCGA-AO-A0JJ-01A-11R-A056-07 | 0.74 |
| TCGA-Z7-A8R5-01A-42R-A41B-07 | 0.74 |
| TCGA-A2-A0YJ-01A-11R-A109-07 | 0.74 |
| TCGA-BH-A18T-01A-11R-A12D-07 | 0.74 |
| TCGA-A8-A08R-01A-11R-A034-07 | 0.73 |
| TCGA-A8-A09M-01A-11R-A00Z-07 | 0.73 |
| TCGA-D8-A1JL-01A-11R-A13Q-07 | 0.73 |
| TCGA-B6-A0I2-01A-11R-A034-07 | 0.73 |
| TCGA-E9-A1RF-01A-11R-A157-07 | 0.73 |
| TCGA-AC-A2FM-01A-11R-A19W-07 | 0.73 |
| TCGA-BH-A204-01A-11R-A157-07 | 0.73 |
| TCGA-A2-A04Q-01A-21R-A034-07 | 0.73 |
| TCGA-AO-A03R-01A-21R-A034-07 | 0.73 |
| TCGA-A2-A1G4-01A-11R-A13Q-07 | 0.72 |
| TCGA-E2-A106-01A-11R-A10J-07 | 0.72 |
| TCGA-C8-A26V-01A-11R-A16F-07 | 0.72 |
| TCGA-A7-A13H-01A-11R-A22K-07 | 0.72 |
| TCGA-3C-AALI-01A-11R-A41B-07 | 0.72 |
| TCGA-B6-A0RL-01A-11R-A084-07 | 0.72 |
| TCGA-EW-A2FW-01A-11R-A17B-07 | 0.72 |
| TCGA-BH-A0H0-01A-11R-A056-07 | 0.71 |
| TCGA-BH-A0DK-11A-13R-A089-07 | 0.71 |
| TCGA-AN-A0FK-01A-11R-A034-07 | 0.71 |
| TCGA-AN-A0XR-01A-11R-A109-07 | 0.71 |
| TCGA-AR-A5QM-01A-11R-A27Q-07 | 0.71 |
| TCGA-D8-A1J8-01A-11R-A13Q-07 | 0.71 |
| TCGA-B6-A0IO-01A-11R-A034-07 | 0.71 |
| TCGA-LL-A7T0-01A-31R-A352-07 | 0.7 |
| TCGA-D8-A1X6-01A-11R-A14M-07 | 0.7 |
| TCGA-GM-A2DH-01A-11R-A180-07 | 0.7 |
| TCGA-AR-A24H-01A-11R-A169-07 | 0.7 |
| TCGA-B6-A0RH-01A-21R-A115-07 | 0.7 |
| TCGA-E9-A1N4-01A-11R-A14M-07 | 0.7 |
| TCGA-C8-A3M7-01A-12R-A21T-07 | 0.7 |
| TCGA-E2-A15I-01A-21R-A137-07 | 0.7 |
| TCGA-AC-A7VB-01A-11R-A352-07 | 0.7 |
| TCGA-AR-A0TX-01A-11R-A084-07 | 0.7 |
| TCGA-AC-A3TN-01A-11R-A22K-07 | 0.7 |
| TCGA-LL-A50Y-01A-11R-A266-07 | 0.7 |
| TCGA-AR-A24Z-01A-11R-A169-07 | 0.69 |
| TCGA-BH-A18S-11A-43R-A12D-07 | 0.69 |
| TCGA-BH-A0RX-01A-21R-A084-07 | 0.69 |
| TCGA-A2-A0T1-01A-21R-A084-07 | 0.69 |
| TCGA-BH-A0BA-11A-22R-A19E-07 | 0.69 |
| TCGA-A7-A4SB-01A-21R-A266-07 | 0.69 |
| TCGA-BH-A0B1-01A-12R-A056-07 | 0.69 |
| TCGA-AC-A62X-01A-11R-A29R-07 | 0.69 |
| TCGA-AO-A03O-01A-11R-A00Z-07 | 0.69 |
| TCGA-AC-A2FG-01A-11R-A17B-07 | 0.69 |
| TCGA-A8-A08L-01A-11R-A00Z-07 | 0.69 |
| TCGA-OL-A66N-01A-12R-A31O-07 | 0.68 |
| TCGA-E9-A1R4-01A-21R-A14D-07 | 0.68 |
| TCGA-BH-A0E6-01A-11R-A034-07 | 0.68 |
| TCGA-B6-A0WZ-01A-11R-A109-07 | 0.68 |
| TCGA-B6-A409-01A-11R-A24H-07 | 0.68 |
| TCGA-BH-A0BM-01A-11R-A056-07 | 0.68 |
| TCGA-C8-A131-01A-11R-A115-07 | 0.68 |
| TCGA-D8-A1XF-01A-11R-A14D-07 | 0.68 |
| TCGA-LL-A9Q3-01A-11R-A41B-07 | 0.68 |
| TCGA-GM-A3NW-01A-21R-A22K-07 | 0.68 |
| TCGA-S3-A6ZG-01A-22R-A32P-07 | 0.68 |
| TCGA-E2-A14P-01A-31R-A12D-07 | 0.67 |
| TCGA-AN-A0XU-01A-11R-A109-07 | 0.67 |
| TCGA-E2-A150-01A-11R-A12D-07 | 0.67 |
| TCGA-E9-A1NC-01A-21R-A26B-07 | 0.67 |
| TCGA-E9-A1ND-11A-43R-A144-07 | 0.67 |
| TCGA-AR-A254-01A-21R-A169-07 | 0.67 |
| TCGA-D8-A27M-01A-11R-A16F-07 | 0.67 |
| TCGA-A8-A08H-01A-21R-A00Z-07 | 0.67 |
| TCGA-AR-A0U3-01A-11R-A109-07 | 0.67 |
| TCGA-D8-A140-01A-11R-A115-07 | 0.67 |
| TCGA-A8-A09Q-01A-11R-A00Z-07 | 0.67 |
| TCGA-D8-A1JK-01A-11R-A13Q-07 | 0.67 |
| TCGA-A2-A0YF-01A-21R-A109-07 | 0.67 |
| TCGA-A2-A3XX-01A-21R-A239-07 | 0.67 |
| TCGA-BH-A0DO-01B-11R-A12D-07 | 0.66 |
| TCGA-LL-A6FR-01A-12R-A31O-07 | 0.66 |
| TCGA-B6-A3ZX-01A-11R-A239-07 | 0.66 |
| TCGA-EW-A2FV-01A-11R-A17B-07 | 0.66 |
| TCGA-B6-A0WS-01A-11R-A115-07 | 0.66 |
| TCGA-A8-A07R-01A-21R-A034-07 | 0.66 |
| TCGA-AR-A1AP-01A-11R-A12P-07 | 0.66 |
| TCGA-E9-A1RH-01A-21R-A169-07 | 0.66 |
| TCGA-BH-A0B7-01A-12R-A115-07 | 0.66 |
| TCGA-AO-A0J9-01A-11R-A034-07 | 0.66 |
| TCGA-B6-A0RV-01A-11R-A084-07 | 0.66 |
| TCGA-A8-A08S-01A-11R-A034-07 | 0.66 |
| TCGA-BH-A0C3-11A-23R-A12P-07 | 0.66 |
| TCGA-A7-A6VY-01A-12R-A33J-07 | 0.66 |
| TCGA-BH-A0BG-01A-11R-A115-07 | 0.66 |
| TCGA-AN-A0AJ-01A-11R-A00Z-07 | 0.66 |
| TCGA-AR-A0TV-01A-21R-A084-07 | 0.66 |
| TCGA-D8-A1X7-01A-11R-A14M-07 | 0.65 |
| TCGA-D8-A1XG-01A-11R-A14D-07 | 0.65 |
| TCGA-A2-A0CM-01A-31R-A034-07 | 0.65 |
| TCGA-E9-A228-01A-31R-A157-07 | 0.65 |
| TCGA-A8-A09I-01A-22R-A034-07 | 0.65 |
| TCGA-BH-A203-01A-12R-A169-07 | 0.65 |
| TCGA-GM-A2D9-01A-11R-A18M-07 | 0.65 |
| TCGA-BH-A1FN-11A-34R-A13Q-07 | 0.65 |
| TCGA-BH-A8FY-01A-11R-A36F-07 | 0.64 |
| TCGA-OL-A5D6-01A-21R-A27Q-07 | 0.64 |
| TCGA-A2-A0CW-01A-21R-A115-07 | 0.64 |
| TCGA-AO-A0JI-01A-21R-A056-07 | 0.64 |
| TCGA-A2-A04R-01A-41R-A109-07 | 0.64 |
| TCGA-D8-A1JA-01A-11R-A13Q-07 | 0.64 |
| TCGA-AQ-A54N-01A-11R-A266-07 | 0.64 |
| TCGA-D8-A1Y3-01A-11R-A157-07 | 0.63 |
| TCGA-AN-A0FT-01A-11R-A034-07 | 0.63 |
| TCGA-LD-A9QF-01A-32R-A41B-07 | 0.63 |
| TCGA-A2-A04Y-01A-21R-A034-07 | 0.63 |
| TCGA-C8-A12Q-01A-11R-A115-07 | 0.63 |
| TCGA-E9-A22B-01A-11R-A157-07 | 0.63 |
| TCGA-A8-A06U-01A-11R-A00Z-07 | 0.63 |
| TCGA-E2-A9RU-01A-11R-A41B-07 | 0.63 |
| TCGA-E2-A14T-01A-11R-A115-07 | 0.63 |
| TCGA-EW-A1P7-01A-21R-A144-07 | 0.63 |
| TCGA-D8-A145-01A-11R-A115-07 | 0.62 |
| TCGA-E2-A576-01A-11R-A31O-07 | 0.62 |
| TCGA-S3-A6ZH-01A-22R-A32P-07 | 0.62 |
| TCGA-A2-A0CY-01A-12R-A034-07 | 0.61 |
| TCGA-AR-A24U-01A-11R-A169-07 | 0.61 |
| TCGA-LL-A6FQ-01A-11R-A31O-07 | 0.61 |
| TCGA-A2-A3XS-01A-11R-A22U-07 | 0.61 |
| TCGA-A8-A06X-01A-21R-A00Z-07 | 0.61 |
| TCGA-AO-A124-01A-11R-A10J-07 | 0.61 |
| TCGA-B6-A0I1-01A-11R-A21T-07 | 0.61 |
| TCGA-E2-A1B4-01A-11R-A12P-07 | 0.61 |
| TCGA-D8-A143-01A-11R-A115-07 | 0.61 |
| TCGA-BH-A1F6-01A-11R-A13Q-07 | 0.61 |
| TCGA-B6-A0RS-01A-11R-A084-07 | 0.6 |
| TCGA-E2-A1LK-01A-21R-A14D-07 | 0.6 |
| TCGA-B6-A0I9-01A-11R-A034-07 | 0.6 |
| TCGA-AC-A5XS-01A-11R-A29R-07 | 0.6 |
| TCGA-A8-A06Y-01A-21R-A00Z-07 | 0.6 |
| TCGA-AN-A046-01A-21R-A034-07 | 0.6 |
| TCGA-B6-A1KF-01A-11R-A13Q-07 | 0.6 |
| TCGA-A2-A0CL-01A-11R-A115-07 | 0.6 |
| TCGA-AN-A04C-01A-21R-A034-07 | 0.6 |
| TCGA-A7-A6VW-01A-21R-A33J-07 | 0.6 |
| TCGA-A8-A06Z-01A-11R-A00Z-07 | 0.59 |
| TCGA-BH-A0B9-01A-11R-A056-07 | 0.59 |
| TCGA-D8-A1JB-01A-11R-A13Q-07 | 0.59 |
| TCGA-D8-A1XJ-01A-11R-A14M-07 | 0.59 |
| TCGA-D8-A1XL-01A-11R-A14M-07 | 0.59 |
| TCGA-C8-A1HK-01A-21R-A13Q-07 | 0.59 |
| TCGA-LQ-A4E4-01A-11R-A266-07 | 0.59 |
| TCGA-OK-A5Q2-01A-11R-A27Q-07 | 0.58 |
| TCGA-B6-A408-01A-12R-A24H-07 | 0.58 |
| TCGA-AO-A03M-01B-11R-A10J-07 | 0.58 |
| TCGA-A2-A3XT-01A-11R-A22U-07 | 0.58 |
| TCGA-GM-A5PV-01A-11R-A28M-07 | 0.58 |
| TCGA-C8-A274-01A-11R-A16F-07 | 0.58 |
| TCGA-A2-A0D4-01A-11R-A00Z-07 | 0.58 |
| TCGA-BH-A0BW-11A-12R-A115-07 | 0.58 |
| TCGA-AR-A2LJ-01A-12R-A19W-07 | 0.58 |
| TCGA-E9-A3X8-01A-31R-A22U-07 | 0.58 |
| TCGA-AO-A0JB-01A-11R-A32Y-07 | 0.58 |
| TCGA-A7-A56D-01A-11R-A27Q-07 | 0.58 |
| TCGA-AC-A2FB-01A-11R-A17B-07 | 0.58 |
| TCGA-C8-A130-01A-31R-A115-07 | 0.58 |
| TCGA-BH-A1FG-01A-11R-A13Q-07 | 0.57 |
| TCGA-PL-A8LV-01A-21R-A41B-07 | 0.57 |
| TCGA-BH-A0HN-01A-11R-A10U-07 | 0.57 |
| TCGA-AO-A12E-01A-11R-A10J-07 | 0.57 |
| TCGA-E9-A1NE-01A-21R-A14M-07 | 0.57 |
| TCGA-AN-A041-01A-11R-A034-07 | 0.57 |
| TCGA-EW-A1P5-01A-11R-A144-07 | 0.56 |
| TCGA-B6-A1KC-01B-11R-A157-07 | 0.56 |
| TCGA-A2-A0EN-01A-13R-A084-07 | 0.56 |
| TCGA-D8-A1XQ-01A-11R-A14M-07 | 0.56 |
| TCGA-D8-A1JT-01A-31R-A13Q-07 | 0.56 |
| TCGA-OL-A5D7-01A-11R-A27Q-07 | 0.55 |
| TCGA-EW-A1PE-01A-11R-A144-07 | 0.55 |
| TCGA-LL-A5YN-01A-11R-A28M-07 | 0.55 |
| TCGA-EW-A1J5-01A-11R-A13Q-07 | 0.55 |
| TCGA-A8-A06Q-01A-11R-A034-07 | 0.55 |
| TCGA-E2-A1LI-01A-12R-A157-07 | 0.55 |
| TCGA-D8-A3Z5-01A-41R-A24H-07 | 0.55 |
| TCGA-A2-A25D-01A-12R-A16F-07 | 0.54 |
| TCGA-A7-A4SD-01A-11R-A266-07 | 0.54 |
| TCGA-A2-A0EY-01A-11R-A034-07 | 0.54 |
| TCGA-OL-A5RW-01A-11R-A28M-07 | 0.54 |
| TCGA-BH-A0B3-01A-11R-A056-07 | 0.54 |
| TCGA-AN-A0AM-01A-11R-A034-07 | 0.54 |
| TCGA-E9-A54Y-01A-11R-A466-07 | 0.54 |
| TCGA-A8-A08A-01A-11R-A32Y-07 | 0.54 |
| TCGA-AQ-A7U7-01A-22R-A352-07 | 0.54 |
| TCGA-D8-A1XW-01A-11R-A14M-07 | 0.54 |
| TCGA-A2-A3XV-01A-21R-A239-07 | 0.54 |
| TCGA-BH-A202-01A-11R-A14M-07 | 0.53 |
| TCGA-EW-A1P4-01A-21R-A144-07 | 0.53 |
| TCGA-A2-A0T2-01A-11R-A084-07 | 0.53 |
| TCGA-D8-A1XU-01A-11R-A14M-07 | 0.53 |
| TCGA-A8-A07U-01A-11R-A034-07 | 0.53 |
| TCGA-B6-A0IN-01A-11R-A034-07 | 0.53 |
| TCGA-A2-A3XW-01A-11R-A239-07 | 0.53 |
| TCGA-E2-A56Z-01A-12R-A29R-07 | 0.53 |
| TCGA-EW-A1OV-01A-11R-A144-07 | 0.52 |
| TCGA-A8-A09G-01A-21R-A00Z-07 | 0.52 |
| TCGA-E2-A1IU-01A-11R-A14D-07 | 0.52 |
| TCGA-BH-A18L-01A-32R-A12D-07 | 0.52 |
| TCGA-BH-A6R8-01A-21R-A33J-07 | 0.52 |
| TCGA-BH-A0E0-01A-11R-A056-07 | 0.52 |
| TCGA-E2-A2P6-01A-11R-A19W-07 | 0.52 |
| TCGA-A8-A091-01A-11R-A00Z-07 | 0.51 |
| TCGA-AC-A3OD-01B-06R-A22O-07 | 0.51 |
| TCGA-AR-A0TR-01A-11R-A084-07 | 0.51 |
| TCGA-A8-A081-01A-11R-A00Z-07 | 0.51 |
| TCGA-AR-A5QN-01A-12R-A28M-07 | 0.51 |
| TCGA-A8-A09K-01A-11R-A00Z-07 | 0.51 |
| TCGA-AR-A1AT-01A-11R-A12P-07 | 0.51 |
| TCGA-GM-A2DC-01A-11R-A18M-07 | 0.51 |
| TCGA-B6-A0IE-01A-11R-A034-07 | 0.5 |
| TCGA-AR-A0TW-01A-11R-A084-07 | 0.5 |
| TCGA-BH-A1FR-01A-11R-A13Q-07 | 0.5 |
| TCGA-E9-A22H-01A-11R-A157-07 | 0.5 |
| TCGA-A2-A0CR-01A-11R-A22K-07 | 0.5 |
| TCGA-AR-A1AO-01A-11R-A12P-07 | 0.5 |
| TCGA-AC-A3QQ-01B-06R-A22O-07 | 0.5 |
| TCGA-D8-A1JF-01A-11R-A13Q-07 | 0.5 |
| TCGA-A2-A0YI-01A-31R-A10J-07 | 0.5 |
| TCGA-BH-A0AW-01A-11R-A056-07 | 0.5 |
| TCGA-B6-A0X1-01A-11R-A109-07 | 0.49 |
| TCGA-D8-A1XR-01A-11R-A14M-07 | 0.49 |
| TCGA-LL-A5YM-01A-11R-A28M-07 | 0.49 |
| TCGA-C8-A1HO-01A-11R-A13Q-07 | 0.49 |
| TCGA-BH-A18H-01A-11R-A12D-07 | 0.49 |
| TCGA-EW-A423-01A-11R-A24H-07 | 0.49 |
| TCGA-E9-A5UP-01A-11R-A28M-07 | 0.49 |
| TCGA-GM-A3XL-01A-11R-A22U-07 | 0.48 |
| TCGA-AO-A03U-01B-21R-A10J-07 | 0.48 |
| TCGA-OL-A6VO-01A-12R-A33J-07 | 0.48 |
| TCGA-E2-A14Y-01A-21R-A12D-07 | 0.48 |
| TCGA-AO-A1KR-01A-12R-A144-07 | 0.48 |
| TCGA-E9-A1N3-01A-12R-A157-07 | 0.48 |
| TCGA-EW-A2FS-01A-11R-A17B-07 | 0.47 |
| TCGA-AR-A2LH-01A-31R-A18M-07 | 0.47 |
| TCGA-A2-A0CQ-01A-21R-A034-07 | 0.47 |
| TCGA-AO-A03T-01A-21R-A034-07 | 0.47 |
| TCGA-E2-A10E-01A-21R-A10J-07 | 0.47 |
| TCGA-C8-A278-01A-11R-A169-07 | 0.47 |
| TCGA-A8-A08B-01A-11R-A00Z-07 | 0.46 |
| TCGA-A8-A075-01A-11R-A084-07 | 0.46 |
| TCGA-BH-A0E1-01A-11R-A056-07 | 0.46 |
| TCGA-E2-A1B5-01A-21R-A12P-07 | 0.46 |
| TCGA-5T-A9QA-01A-11R-A41B-07 | 0.46 |
| TCGA-A8-A06N-01A-11R-A00Z-07 | 0.45 |
| TCGA-E2-A14X-01A-11R-A115-07 | 0.45 |
| TCGA-AC-A62Y-01A-11R-A29R-07 | 0.45 |
| TCGA-BH-A209-01A-11R-A157-07 | 0.45 |
| TCGA-C8-A1HG-01A-11R-A137-07 | 0.45 |
| TCGA-EW-A3U0-01A-11R-A22K-07 | 0.45 |
| TCGA-AO-A12H-01A-11R-A115-07 | 0.44 |
| TCGA-GI-A2C8-01A-11R-A16F-07 | 0.44 |
| TCGA-WT-AB41-01A-11R-A41B-07 | 0.44 |
| TCGA-E2-A155-01A-11R-A12D-07 | 0.43 |
| TCGA-LL-A442-01A-11R-A24H-07 | 0.43 |
| TCGA-A7-A13G-01B-04R-A22O-07 | 0.43 |
| TCGA-C8-A12U-01A-11R-A115-07 | 0.43 |
| TCGA-E2-A10C-01A-21R-A10J-07 | 0.43 |
| TCGA-EW-A1OX-01A-11R-A144-07 | 0.43 |
| TCGA-AO-A0J2-01A-11R-A034-07 | 0.43 |
| TCGA-OL-A5RU-01A-11R-A28M-07 | 0.42 |
| TCGA-AR-A1AJ-01A-21R-A12P-07 | 0.42 |
| TCGA-BH-A1EN-01A-11R-A13Q-07 | 0.42 |
| TCGA-E2-A1LG-01A-21R-A14M-07 | 0.41 |
| TCGA-C8-A275-01A-21R-A16F-07 | 0.41 |
| TCGA-A2-A25F-01A-11R-A169-07 | 0.41 |
| TCGA-E2-A1LS-01A-12R-A157-07 | 0.41 |
| TCGA-BH-A1F0-01A-11R-A137-07 | 0.41 |
| TCGA-A2-A3XZ-01A-42R-A239-07 | 0.41 |
| TCGA-C8-A12Z-01A-11R-A115-07 | 0.4 |
| TCGA-E9-A24A-01A-11R-A169-07 | 0.4 |
| TCGA-GM-A2DB-01A-31R-A18M-07 | 0.4 |
| TCGA-A2-A0ER-01A-21R-A034-07 | 0.4 |
| TCGA-A8-A094-01A-11R-A00Z-07 | 0.39 |
| TCGA-B6-A0RO-01A-22R-A084-07 | 0.39 |
| TCGA-BH-A0HO-01A-11R-A034-07 | 0.39 |
| TCGA-C8-A27B-01A-11R-A169-07 | 0.38 |
| TCGA-AC-A6IW-01A-12R-A33J-07 | 0.38 |
| TCGA-LL-A8F5-01A-11R-A36F-07 | 0.38 |
| TCGA-GM-A2DM-01A-11R-A180-07 | 0.38 |
| TCGA-GM-A2DN-01A-11R-A180-07 | 0.38 |
| TCGA-UL-AAZ6-01A-11R-A41B-07 | 0.37 |
| TCGA-S3-AA17-01A-11R-A41B-07 | 0.37 |
| TCGA-BH-A1ET-01A-11R-A137-07 | 0.37 |
| TCGA-S3-AA10-01A-21R-A41B-07 | 0.37 |
| TCGA-AR-A252-01A-11R-A169-07 | 0.37 |
| TCGA-BH-A0C0-01A-21R-A056-07 | 0.37 |
| TCGA-E9-A5FK-01A-11R-A27Q-07 | 0.37 |
| TCGA-E2-A572-01A-13R-A31O-07 | 0.36 |
| TCGA-A8-A08X-01A-21R-A00Z-07 | 0.36 |
| TCGA-AN-A0G0-01A-11R-A034-07 | 0.36 |
| TCGA-B6-A0IB-01A-11R-A034-07 | 0.35 |
| TCGA-LL-A5YL-01A-12R-A29R-07 | 0.35 |
| TCGA-A8-A09Z-01A-11R-A00Z-07 | 0.35 |
| TCGA-A2-A0EQ-01A-11R-A034-07 | 0.34 |
| TCGA-A7-A0DC-01A-11R-A00Z-07 | 0.34 |
| TCGA-E2-A1II-01A-11R-A144-07 | 0.34 |
| TCGA-A8-A0A7-01A-11R-A00Z-07 | 0.34 |
| TCGA-B6-A0IJ-01A-11R-A034-07 | 0.34 |
| TCGA-AC-A8OQ-01A-11R-A41B-07 | 0.32 |
| TCGA-E2-A1LA-01A-11R-A144-07 | 0.32 |
| TCGA-AR-A0TT-01A-31R-A084-07 | 0.32 |
| TCGA-OL-A5RZ-01A-11R-A28M-07 | 0.32 |
| TCGA-AR-A1AQ-01A-11R-A12P-07 | 0.31 |
| TCGA-E9-A22D-01A-11R-A157-07 | 0.31 |
| TCGA-E2-A1LH-01A-11R-A14D-07 | 0.31 |
| TCGA-PL-A8LX-01A-11R-A41B-07 | 0.31 |
| TCGA-BH-A0EE-01A-11R-A034-07 | 0.3 |
| TCGA-GM-A3NY-01A-11R-A21T-07 | 0.3 |
| TCGA-BH-A18G-01A-11R-A12D-07 | 0.3 |
| TCGA-AO-A12D-01A-11R-A115-07 | 0.29 |
| TCGA-E2-A1B6-01A-31R-A12P-07 | 0.29 |
| TCGA-LL-A6FP-01A-11R-A31O-07 | 0.28 |
| TCGA-E2-A573-01A-11R-A29R-07 | 0.27 |
| TCGA-E9-A248-01A-11R-A169-07 | 0.27 |
| TCGA-PE-A5DE-01A-11R-A27Q-07 | 0.27 |
| TCGA-BH-A1FC-01A-11R-A13Q-07 | 0.27 |
| TCGA-BH-A0BW-01A-11R-A115-07 | 0.26 |
| TCGA-B6-A0X4-01A-11R-A109-07 | 0.26 |
| TCGA-D8-A1JN-01A-11R-A13Q-07 | 0.26 |
| TCGA-S3-AA15-01A-11R-A41B-07 | 0.25 |
| TCGA-GM-A2DF-01A-11R-A180-07 | 0.25 |
| TCGA-D8-A73U-01A-11R-A33J-07 | 0.25 |
| TCGA-C8-A133-01A-32R-A12D-07 | 0.25 |
| TCGA-C8-A26X-01A-31R-A16F-07 | 0.24 |
| TCGA-AN-A0FL-01A-11R-A034-07 | 0.24 |
| TCGA-AN-A0XP-01A-11R-A109-07 | 0.24 |
| TCGA-AO-A12B-01A-11R-A10J-07 | 0.24 |
| TCGA-OL-A66P-01A-11R-A31O-07 | 0.24 |
| TCGA-BH-A0B6-01A-11R-A19W-07 | 0.23 |
| TCGA-E9-A245-01A-22R-A16F-07 | 0.23 |
| TCGA-GM-A2DO-01A-11R-A18M-07 | 0.23 |
| TCGA-A2-A0SW-01A-11R-A084-07 | 0.22 |
| TCGA-B6-A1KI-01A-11R-A14M-07 | 0.22 |
| TCGA-BH-A18S-01A-11R-A12D-07 | 0.22 |
| TCGA-C8-A12L-01A-11R-A115-07 | 0.22 |
| TCGA-E2-A1IK-01A-11R-A144-07 | 0.21 |
| TCGA-EW-A1PB-01A-11R-A144-07 | 0.21 |
| TCGA-D8-A27E-01A-11R-A16F-07 | 0.21 |
| TCGA-D8-A1JG-01B-11R-A13Q-07 | 0.2 |
| TCGA-A8-A0A6-01A-12R-A056-07 | 0.2 |
| TCGA-EW-A1IZ-01A-11R-A13Q-07 | 0.2 |
| TCGA-D8-A1JS-01A-11R-A13Q-07 | 0.2 |
| TCGA-LL-A5YO-01A-21R-A28M-07 | 0.19 |
| TCGA-A1-A0SQ-01A-21R-A144-07 | 0.19 |
| TCGA-B6-A0RT-01A-21R-A084-07 | 0.19 |
| TCGA-E9-A2JT-01A-22R-A18M-07 | 0.19 |
| TCGA-C8-A1HM-01A-12R-A137-07 | 0.18 |
| TCGA-EW-A6SD-01A-12R-A33J-07 | 0.18 |
| TCGA-A2-A04X-01A-21R-A034-07 | 0.18 |
| TCGA-LL-A7SZ-01A-32R-A352-07 | 0.17 |
| TCGA-B6-A0IA-01A-11R-A034-07 | 0.16 |
| TCGA-BH-A0DH-01A-11R-A084-07 | 0.15 |
| TCGA-UU-A93S-01A-21R-A41B-07 | 0.14 |
| TCGA-C8-A12V-01A-11R-A115-07 | 0.14 |
| TCGA-E2-A14R-01A-11R-A115-07 | 0.13 |
| TCGA-BH-A0H5-01A-21R-A115-07 | 0.12 |
| TCGA-C8-A1HE-01A-11R-A13Q-07 | 0.11 |
| TCGA-AR-A0U0-01A-11R-A109-07 | 0.11 |
| TCGA-E2-A159-01A-11R-A115-07 | 0.1 |
| TCGA-GI-A2C8-11A-22R-A16F-07 | 0.08 |
| TCGA-AO-A128-01A-11R-A10J-07 | 0.07 |
| TCGA-A2-A0ST-01A-12R-A084-07 | 0.06 |
| TCGA-AO-A1KO-01A-31R-A13Q-07 | 0.06 |
| TCGA-AO-A0JC-01A-11R-A056-07 | -0.01 |
| TCGA-E9-A3Q9-01A-11R-A21T-07 | -0.02 |
| TCGA-AR-A1AW-01A-21R-A12P-07 | -0.02 |
| TCGA-EW-A6SB-01A-12R-A32P-07 | -0.03 |
| TCGA-A8-A08I-01A-11R-A00Z-07 | -0.05 |
| TCGA-C8-A26Y-01A-11R-A16F-07 | -0.06 |
| TCGA-A2-A3Y0-01A-11R-A239-07 | -0.07 |
| TCGA-E9-A1ND-01A-11R-A144-07 | -0.17 |
